# Supplementary material for: Myh9 Plays an Essential Role in the Survival and Maintenance of Hematopoietic Stem/Progenitor Cells
Source: MDPI journal article supplement (doi:10.3390/cells11121865), 2022-06-07
Supplement: s1 [file s1]

**Supplementary Materials:**

**Supplementary Table S1: Primers used for genotyping and qRT-PCR.**

|                                  |                        |
|----------------------------------|------------------------|
| Mouse Myh9 genotyping Forward    | TGTCATTAGTGTCTGAGAGCAG |
| Mouse Myh9 genotyping Reverse    | CAGGCATGGAGTTTGTGATG   |
| Mouse Mx1-cre genotyping Forward | GTGAGTTTCGTTTCTGAGCTCC |
| Mouse Mx1-cre genotyping Reverse | CGGTTATTCAACTTGCACCA   |
| Mouse Tifab RT-PCR Forward       | GTTGGGCGAGGACAGAACAC   |
| Mouse Tifab RT-PCR Reverse       | GTCAGCACCTTGAGGCAGA    |
| Mouse Mcl1 RT-PCR Forward        | AAAGGCGGCTGCATAAGTC    |
| Mouse Mcl1 RT-PCR Reverse        | TGGCGGTATAGGTCGTCCTC   |
| Mouse Bcl1 RT-PCR Forward        | GCGTACCCTGACACCAATCTC  |
| Mouse Bcl1 RT-PCR Reverse        | CTCCTCTTCGCACTTCTGCTC  |
| Mouse Gzmb RT-PCR Forward        | CCACTCTCGACCCTACATGG   |
| Mouse Gzmb RT-PCR Reverse        | GGCCCCCAAAGTGACATTTATT |
